# Supplementary material for: Applying the heteroatom effect of chalcogen for high-performance small-molecule solar cells
Source: Royal Society of Chemistry journal article supplement (doi:10.1039/c6ta10559a), 2017-01-01

## Applying Heteroatom Effect of Chalcogen for High-Performance Small-Molecule Solar Cells

Zichun Zhou,<sup>‡ac</sup> Shengjie Xu,<sup>‡ac</sup> Wenrui Liu,<sup>c</sup> Cheng Zhang,<sup>ac</sup> Qin Hu,<sup>d</sup> Feng Liu,<sup>b\*</sup> Thomas P. Russell<sup>d</sup> and Xiaozhang Zhu<sup>\*ac</sup>

<sup>a</sup> Beijing National Laboratory for Molecular Sciences, CAS Key Laboratory of Organic Solids, Institute of Chemistry, Chinese Academy of Sciences, Beijing 100190, China. E-mail: xzzhu@iccas.ac.cn

<sup>b</sup> Department of Physics and Astronomy, Shanghai Jiaotong University, Shanghai 200240, China. E-mail: iamfengliu@gmail.com

<sup>c</sup> University of Chinese Academy of Sciences, Beijing 100049, China

<sup>d</sup> Polymer Science and Engineering Department, University of Massachusetts, Amherst, Massachusetts 01003, United States

## Physical properties and thin-film morphology

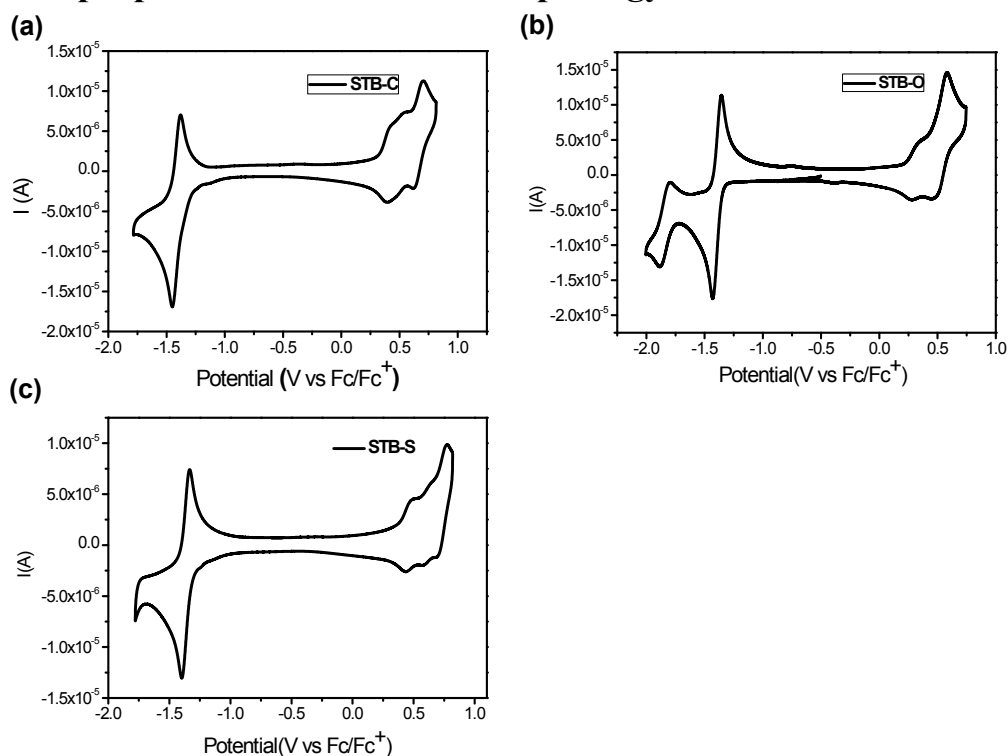

**Figure S1.** Cyclic voltammogram of (a) STB-C, (b) STB-O and (c) STB-S films on the glassy-carbon electrode with scan rate of  $100 \text{ mV s}^{-1}$ .

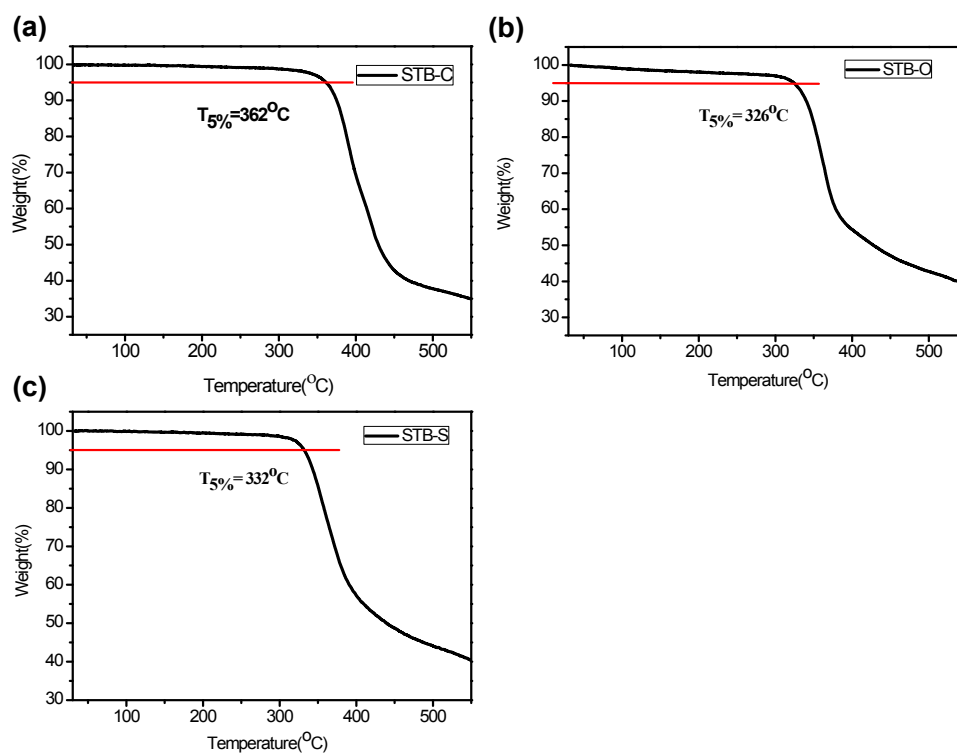

**Figure S2.** Thermal gravimetric analysis (TGA) curves of polymers (a) STB-C, (b) STB-O and (c) STB-S.

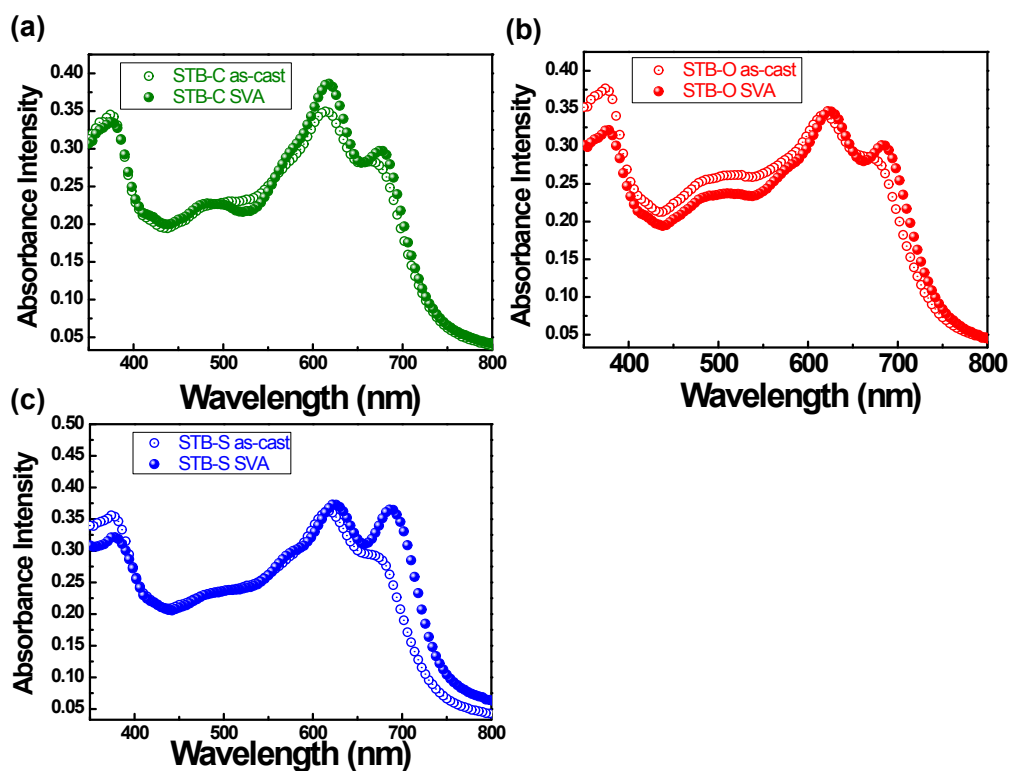

**Figure S3.** The UV-vis spectra of (a) STB-C, (b) STB-O and (c) STB-S blended with PC<sub>71</sub>BM before and after SVA at the best device performance conditions.

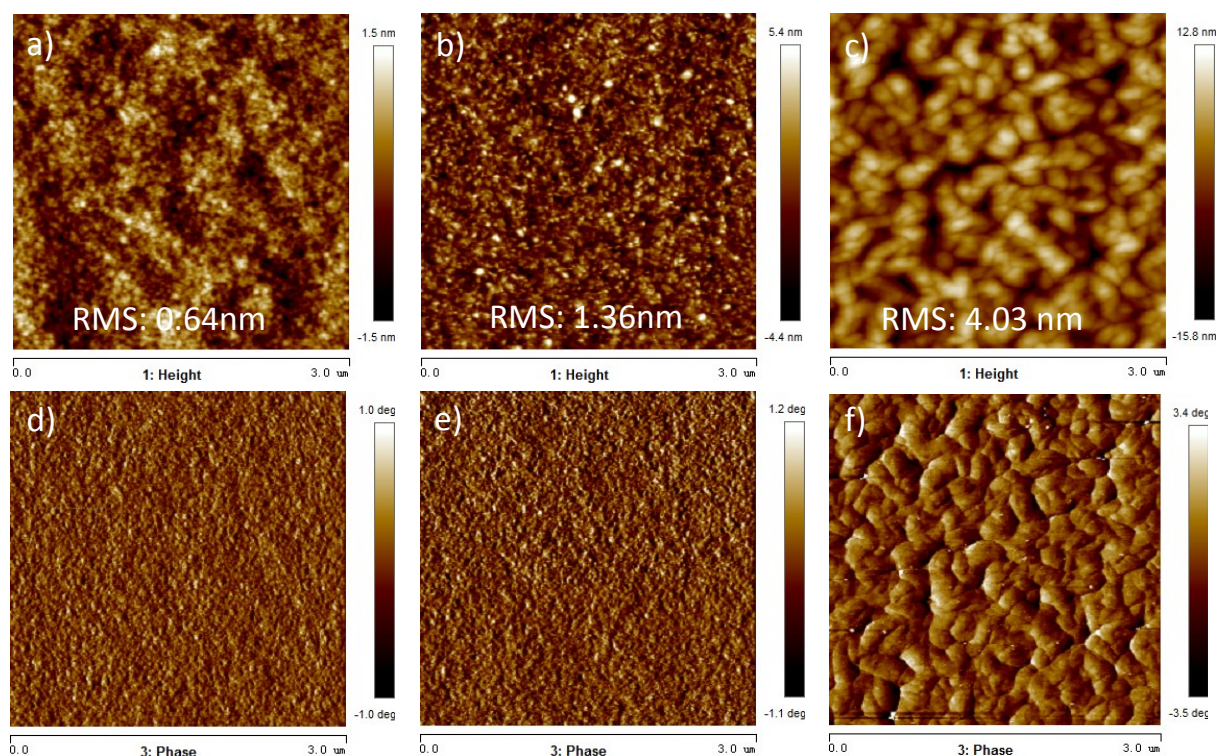

**Figure S4.** AFM height images (a-c) and AFM phase images (d-f) of optimized blend films after SVA based on (a, d) STB-C, (b, e) STB-O and (c, f) STB-S blended with PC<sub>71</sub>BM. The scan size of the AFM images is  $3 \times 3 \mu\text{m}$ .

## Device performance and analysis

**Table S1.** Photovoltaic performance of the STBs in conventional BHJ devices with different D/A ratio.

| Materials | D/A Ratio | $V_{oc}$<br>(V) | $J_{sc}$<br>(mA cm <sup>-2</sup> ) | FF   | PC<br>E<br>(%) |
|-----------|-----------|-----------------|------------------------------------|------|----------------|
| STB-C     | 1:1       | 1.03            | 8.14                               | 0.40 | 3.35           |
|           | 1:1.5     | 1.03            | 10.53                              | 0.41 | 4.56           |
|           | 1:2       | 1.01            | 9.50                               | 0.39 | 3.74           |
| STB-O     | 1:1       | 0.94            | 8.07                               | 0.36 | 2.73           |
|           | 1:1.5     | 0.94            | 8.92                               | 0.36 | 3.07           |
|           | 1:2       | 0.93            | 7.65                               | 0.35 | 2.49           |
| STB-S     | 1:1       | 1.00            | 8.17                               | 0.32 | 2.61           |
|           | 1:1.5     | 1.00            | 8.31                               | 0.34 | 3.00           |
|           | 1:2       | 0.99            | 7.83                               | 0.30 | 2.32           |

**Table S2.** Thickness influence on photovoltaic performance of the STBs in conventional BHJ devices after SVA for 40s.

| Materials | Thickness<br>(nm) | $V_{oc}$<br>(V) | $J_{sc}$<br>(mA cm <sup>-2</sup> ) | FF   | PC<br>E<br>(%) |
|-----------|-------------------|-----------------|------------------------------------|------|----------------|
| STB-C     | 80                | 0.93            | 11.84                              | 0.67 | 7.47           |
|           | 100               | 0.94            | 12.10                              | 0.68 | 7.84           |
|           | 120               | 0.93            | 12.24                              | 0.67 | 7.62           |
| STB-O     | 80                | 0.91            | 13.24                              | 0.70 | 8.27           |
|           | 100               | 0.91            | 13.85                              | 0.70 | 8.68           |
|           | 120               | 0.90            | 13.56                              | 0.68 | 8.31           |
| STB-S     | 80                | 1.01            | 9.11                               | 0.40 | 3.68           |
|           | 100               | 1.02            | 9.68                               | 0.40 | 4.05           |
|           | 120               | 1.01            | 8.08                               | 0.40 | 3.28           |

**Table S3.** Photovoltaic performance of the STBs in conventional BHJ devices with different SVA time.

| Materials | SVA Time<br>(s) | $V_{oc}$<br>(V) | $J_{sc}$<br>(mA cm <sup>-2</sup> ) | FF   | PC       |
|-----------|-----------------|-----------------|------------------------------------|------|----------|
|           |                 |                 |                                    |      | E<br>(%) |
| STB-C     | 30              | 0.97            | 11.37                              | 0.60 | 6.63     |
|           | 40              | 0.94            | 12.10                              | 0.68 | 7.84     |
|           | 50              | 0.93            | 10.49                              | 0.68 | 6.75     |
| STB-O     | 30              | 0.92            | 11.94                              | 0.66 | 7.25     |
|           | 40              | 0.91            | 13.85                              | 0.70 | 8.68     |
|           | 50              | 0.89            | 12.69                              | 0.69 | 7.80     |
| STB-S     | 30              | 1.01            | 9.11                               | 0.37 | 3.40     |
|           | 40              | 1.02            | 9.68                               | 0.40 | 4.05     |
|           | 50              | 1.01            | 8.08                               | 0.40 | 3.25     |

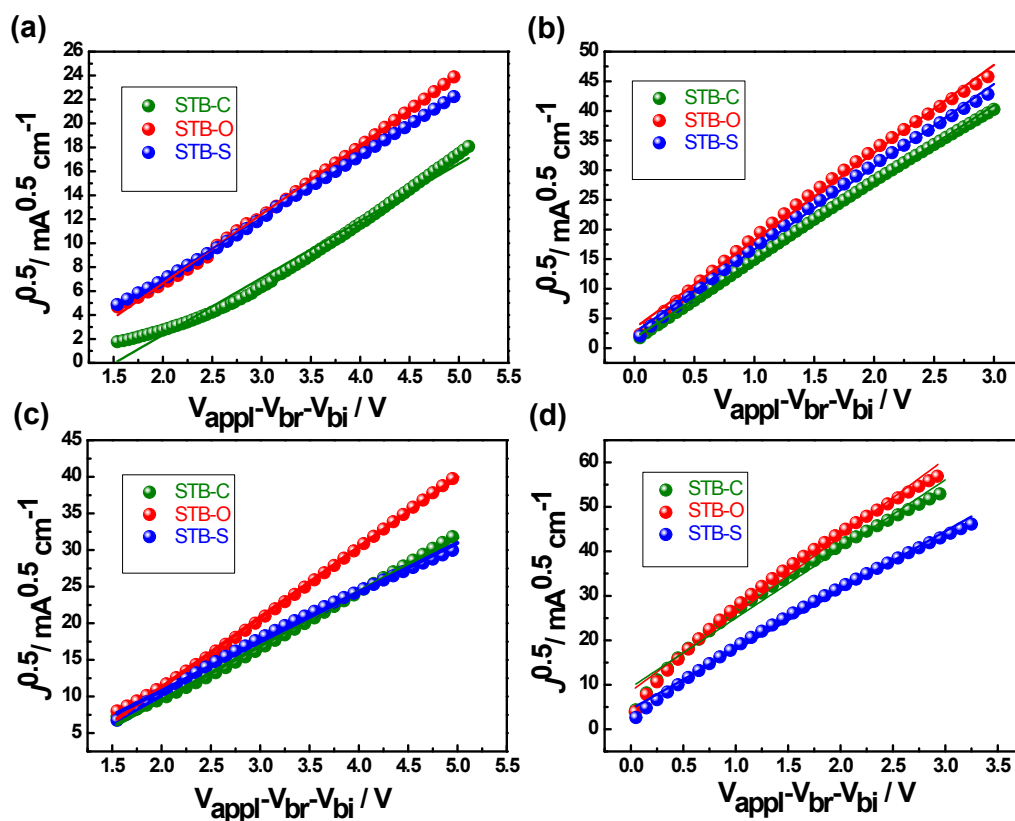

**Figure**

**S5.** The hole mobility (a, c) and electron mobility (b, d) of STB-n:PC<sub>71</sub>BM before (a, b) and after (c, d) SVA at their best OSC device characters measured by SCLC method.



# NMR Charts

4,4'-(4,8-Bis(3-ethylheptyl)benzo[1,2-*b*:4,5-*b'*]dithiophene-2,6-diyl)bis(2-(2-ethylhexyl)thieno [3,4-*b*]thiophene-6-carbaldehyde) (3a).

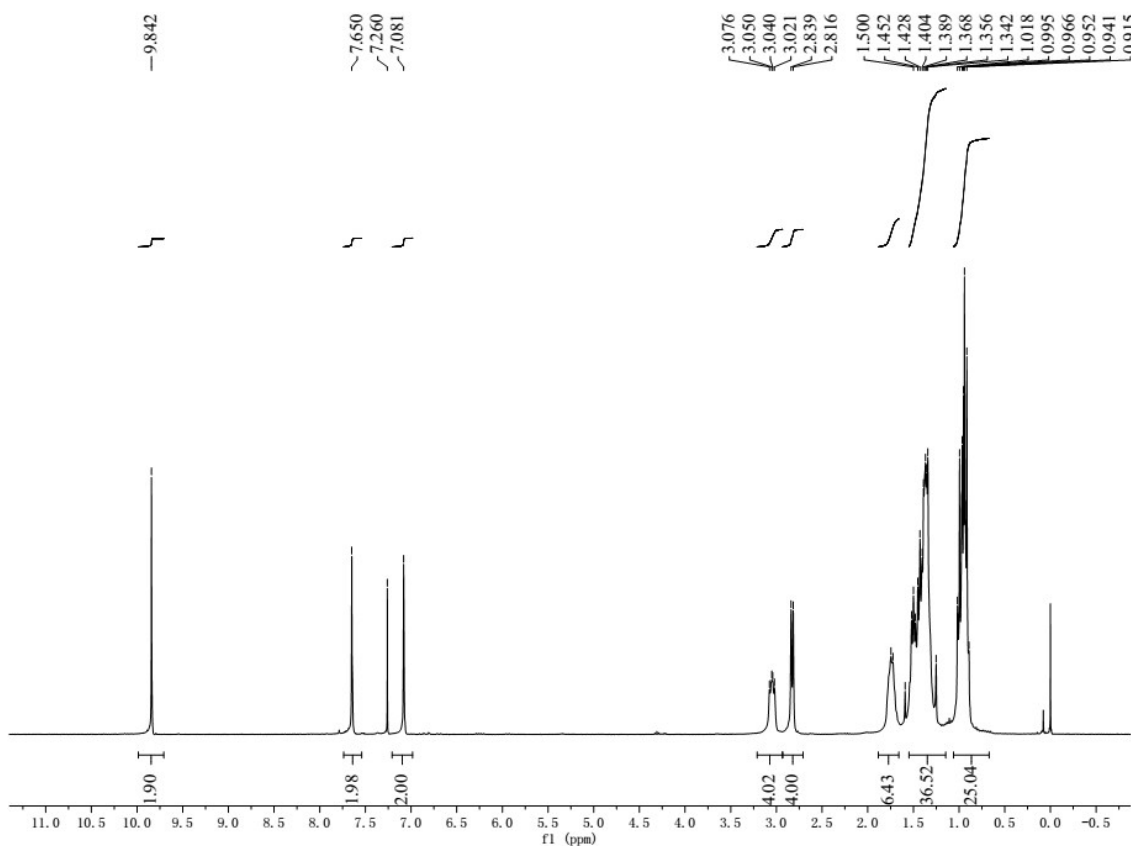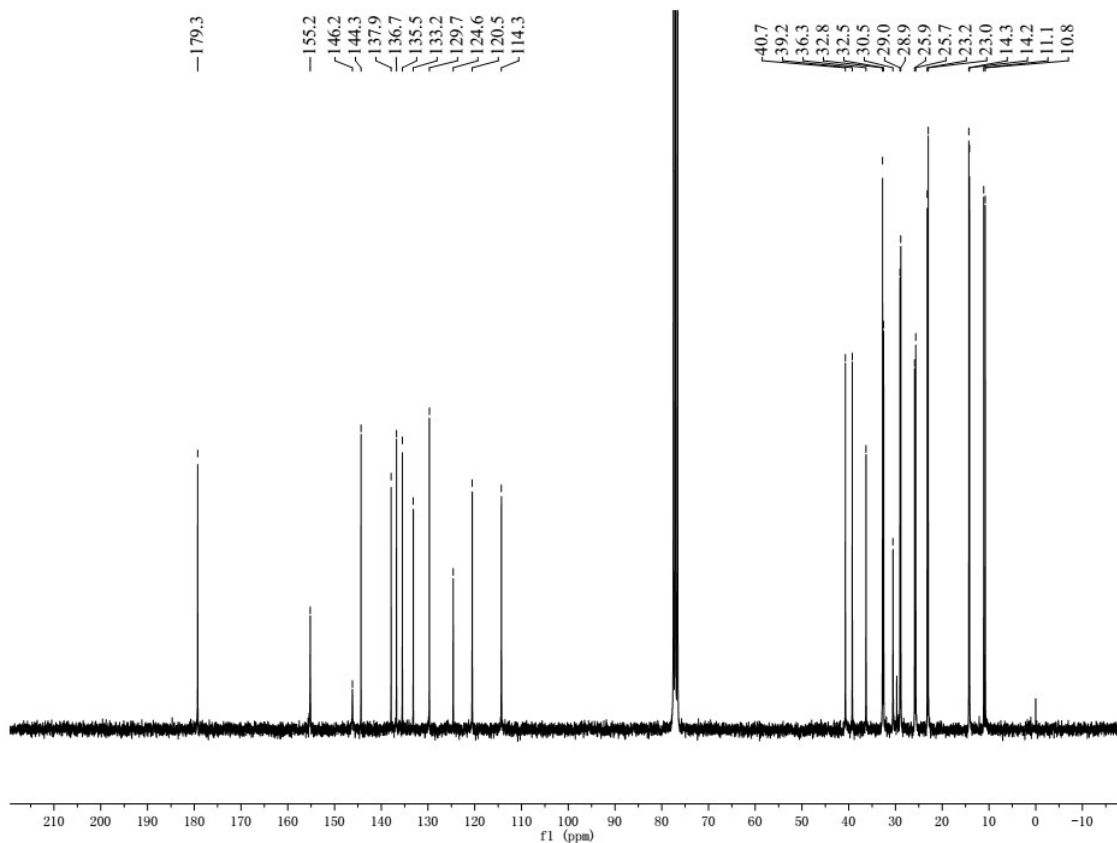

**(5Z,5'Z)-5,5'-((6,6'-(4,8-bis(3-ethylheptyl)benzo[1,2-*b*:4,5-*b'*]dithiophene-2,6-diyl)bis(2-(2-ethylhexyl)thieno[3,4-*b*]thiophene-6,4-diyl))bis(methanylylidene))bis(3-ethyl-2-thioxothiazolidin-4-one) (STB-C).**

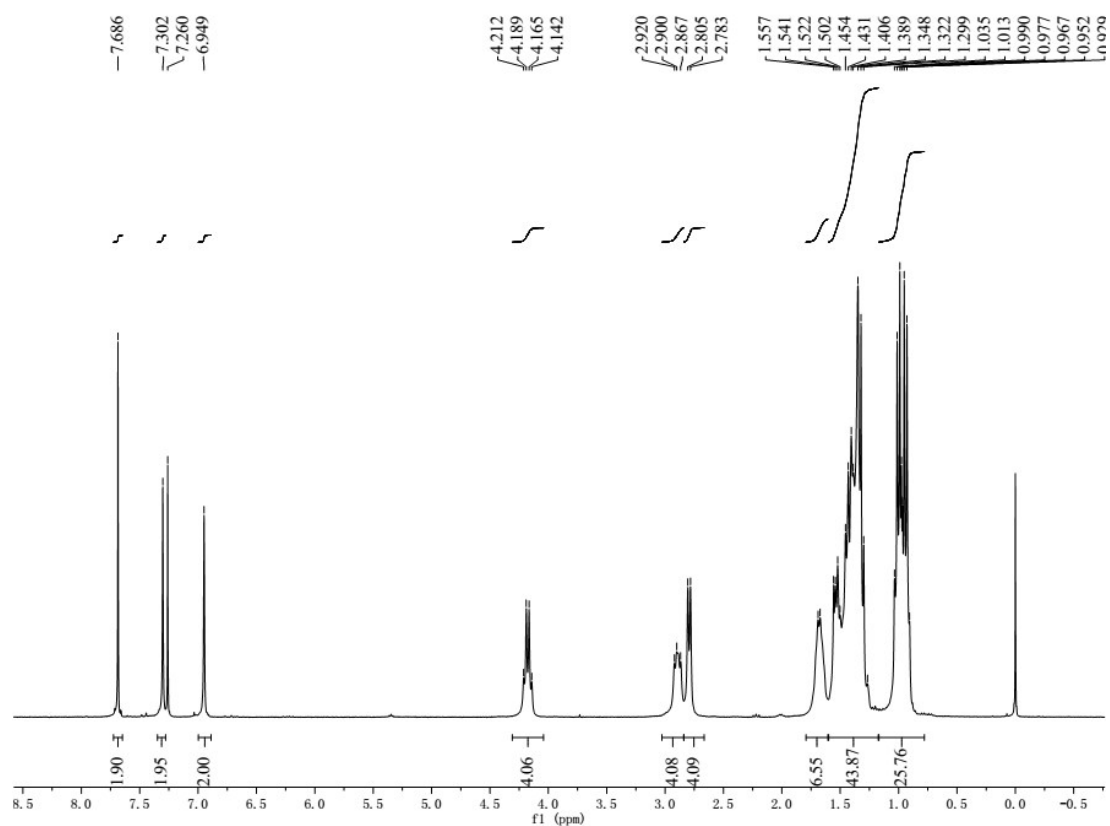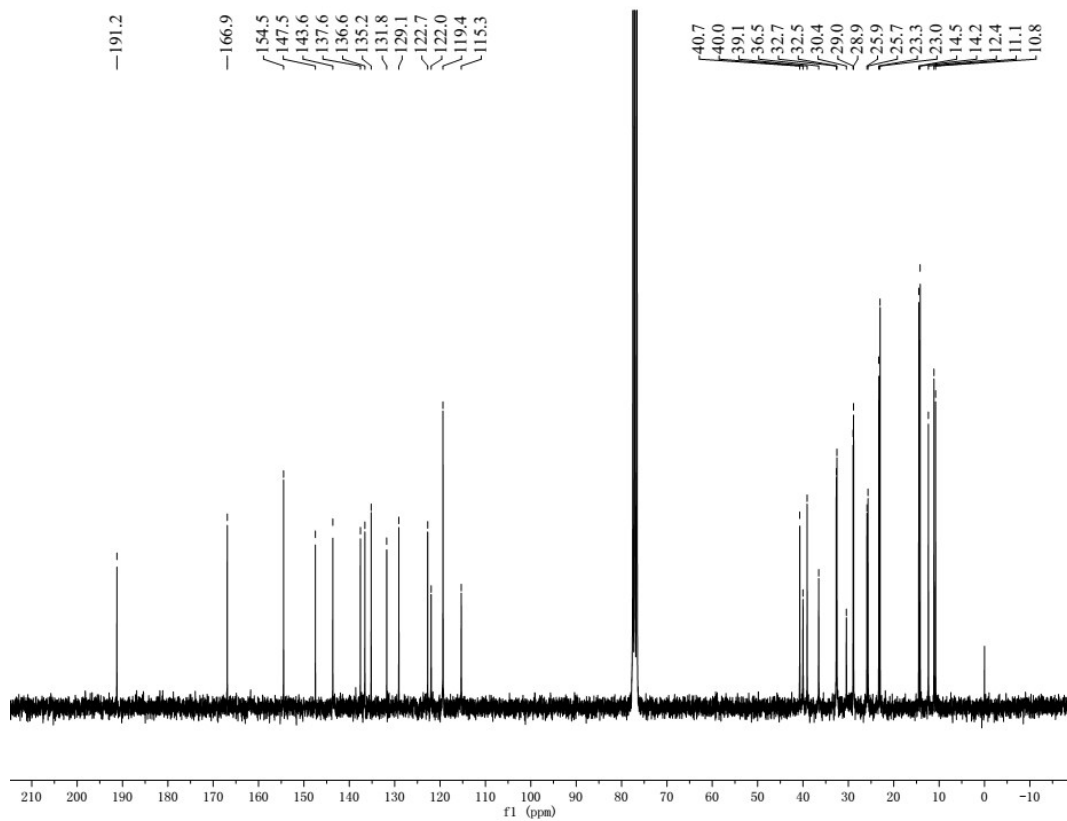



**4,4'-(4,8-Bis((2-ethylhexyl)oxy)benzo[1,2-*b*:4,5-*b'*]dithiophene-2,6-diyl)bis(2-(2-ethylhexyl)thieno[3,4-*b*]thiophene-6-carbaldehyde) (3b).**

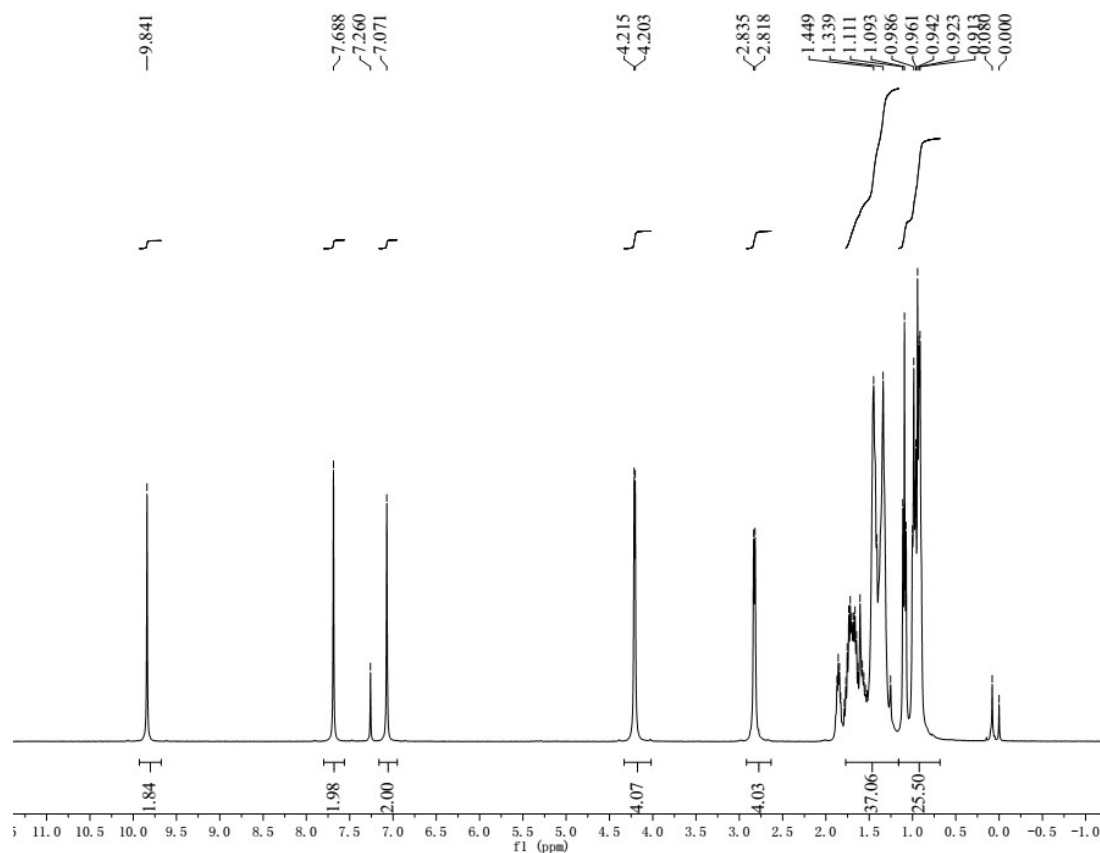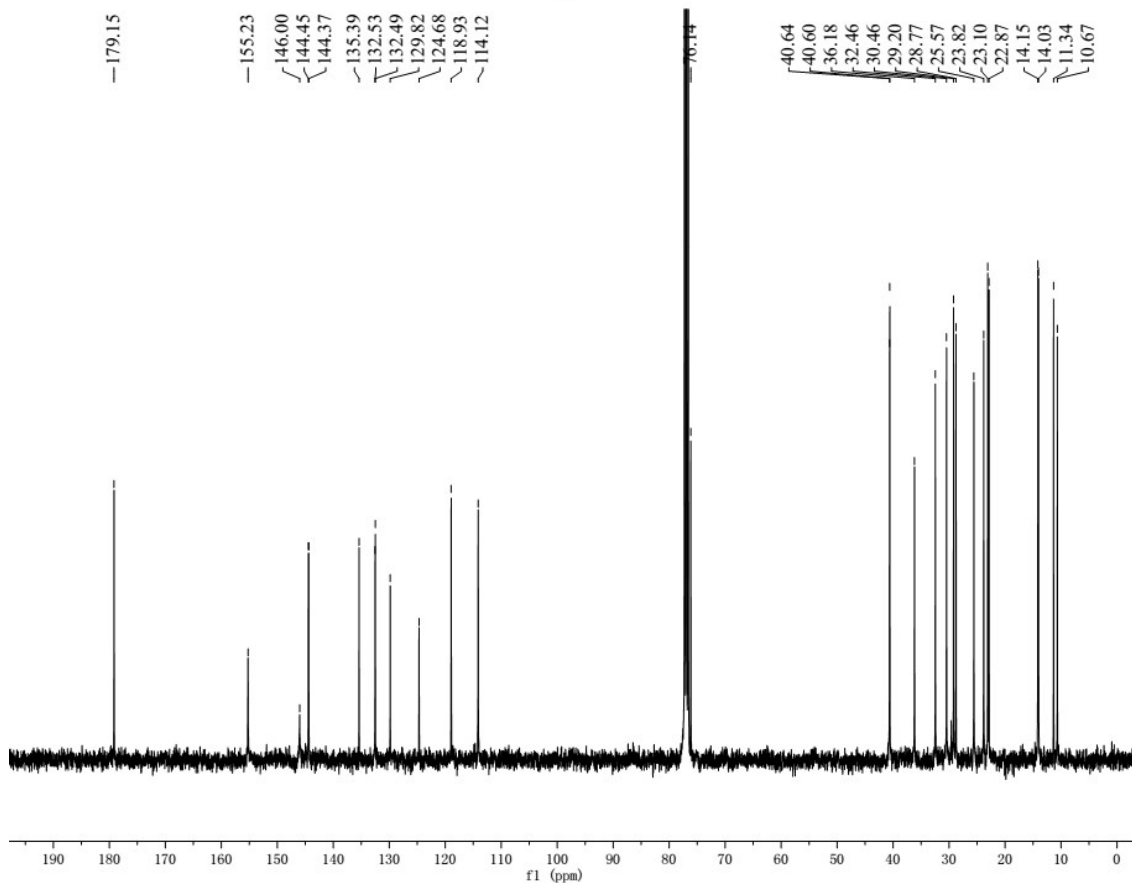

**(5Z,5'Z)-5,5'-((4,4'-(4,8-bis((2-ethylhexyl)oxy)benzo[1,2-*b*:4,5-*b'*]dithiophene-2,6-diyl)bis(2-(2-ethylhexyl)thieno[3,4-*b*]thiophene-6,4-diyl))bis(methanylylidene))bis(3-ethyl-2-thioxothiazolidin-4-one) (STB-O).**

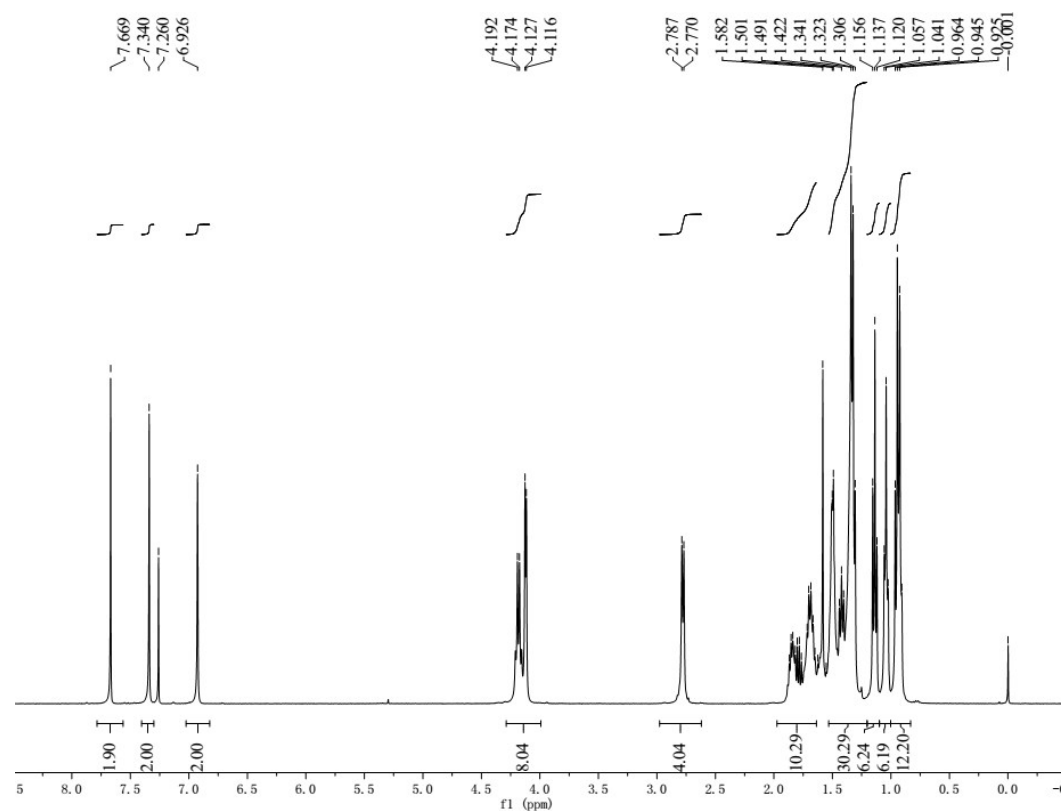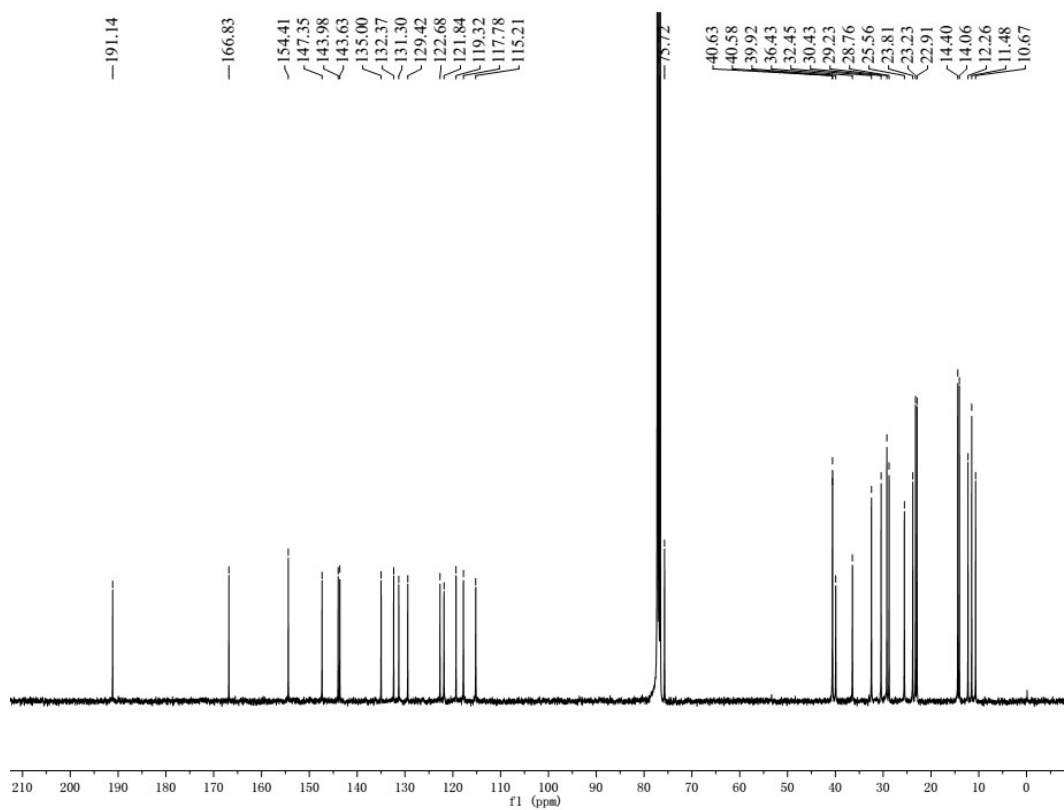

**4,4'-(4,8-Bis((2-ethylhexyl)thio)benzo[1,2-*b*:4,5-*b'*]dithiophene-2,6-diyl)bis(2-(2-ethylhexyl)thieno[3,4-*b*]thiophene-6-carbaldehyde) (3c)**

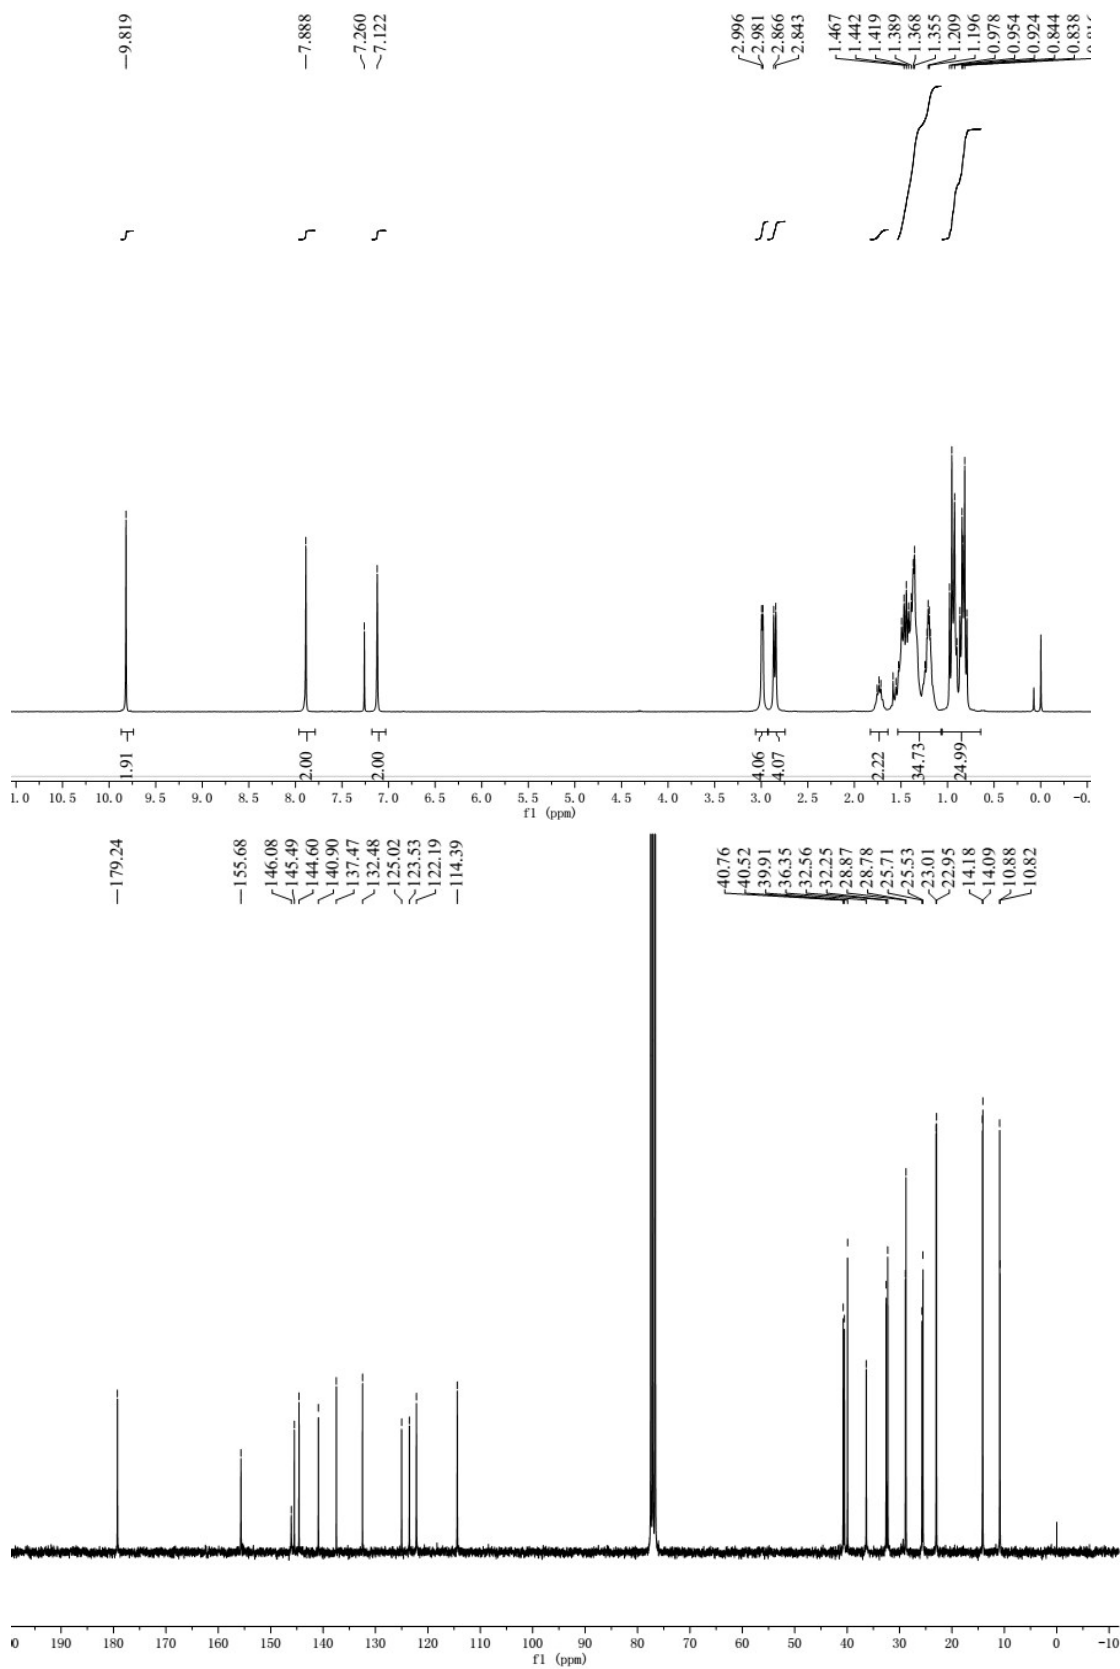

**(5Z,5'Z)-5,5'-((4,4'-(4,8-bis((2-ethylhexyl)thio)benzo[1,2-*b*:4,5-*b'*]dithiophene-2,6-diy))bis(2-(2-ethylhexyl)thieno[3,4-*b*]thiophene-6,4-diy))bis(methanylylidene))bis(3-ethyl-2-thioxothiazolidin-4-one) (STB-S).**

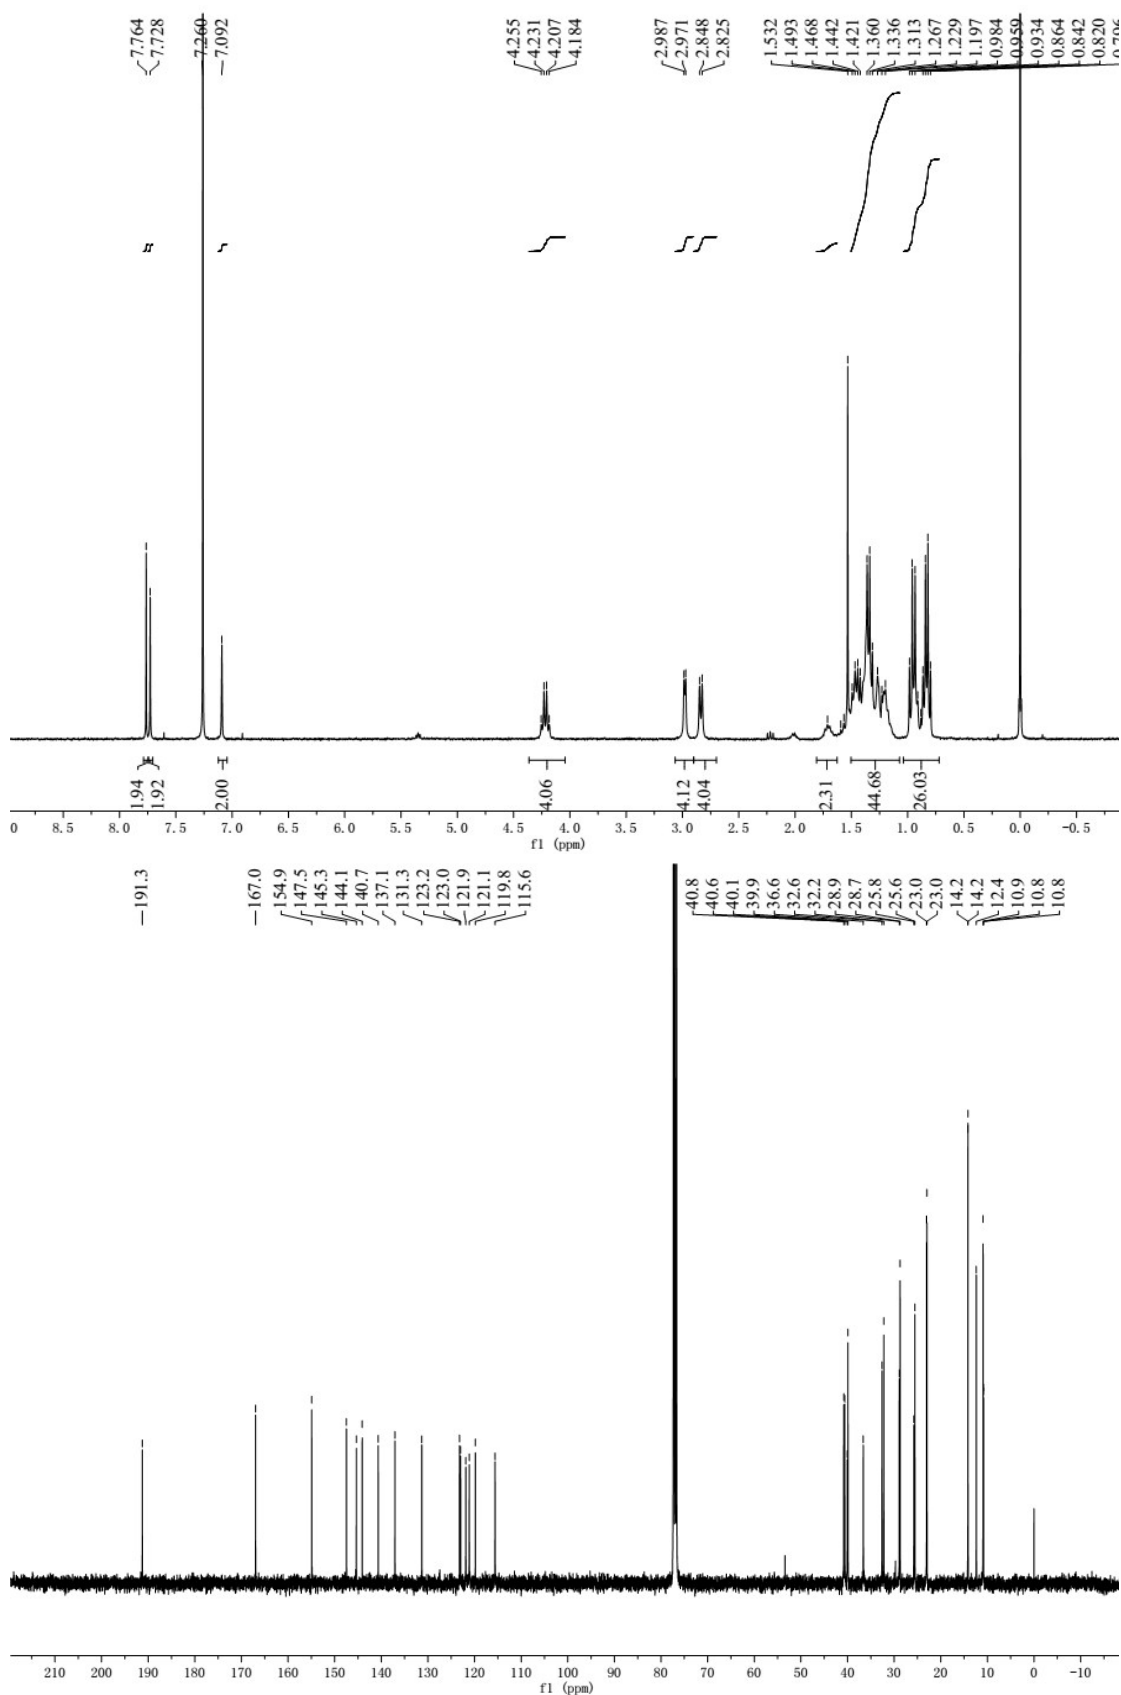

Supplement: c6ta10559a1.pdf [file c6ta10559a1.pdf]
